# Supplementary material
Source: HighWire-hosted journal article supplement (https://bmjopen.bmj.com/content/11/12/e049072)
Supplement: inline-supplementary-material-1 [file inline-supplementary-material-1.pdf]

## Supplementary File 1 – Pubmed Search Strategy

|     |                                                                                                                                                                                                                                                                                                                                                                                                                                                                                                                                                                                                                                                  |
|-----|--------------------------------------------------------------------------------------------------------------------------------------------------------------------------------------------------------------------------------------------------------------------------------------------------------------------------------------------------------------------------------------------------------------------------------------------------------------------------------------------------------------------------------------------------------------------------------------------------------------------------------------------------|
| #1  | "Aged"[Mesh]                                                                                                                                                                                                                                                                                                                                                                                                                                                                                                                                                                                                                                     |
| #2  | ((((aged[Title/Abstract] OR elderly[Title/Abstract] OR senior[Title/Abstract] OR seniors[Title/Abstract] OR older person[Title/Abstract] OR older persons[Title/Abstract] OR older people[Title/Abstract] OR older adult[Title/Abstract] OR older adults[Title/Abstract] OR older patient[Title/Abstract] OR older patients[Title/Abstract])) OR (aged[Text Word] OR elderly[Text Word] OR senior[Text Word] OR seniors[Text Word] OR older person[Text Word] OR older persons[Text Word] OR older people[Text Word] OR older adult[Text Word] OR older adults[Text Word] OR older patient[Text Word] OR older patients[Text Word]))))           |
| #3  | "Comorbidity"[Mesh]                                                                                                                                                                                                                                                                                                                                                                                                                                                                                                                                                                                                                              |
| #4  | ((((comorbidity[Title/Abstract] OR multimorbidity[Title/Abstract])) OR (comorbidity[Text Word] OR multimorbidity[Text Word])))                                                                                                                                                                                                                                                                                                                                                                                                                                                                                                                   |
| #5  | #1 OR #2                                                                                                                                                                                                                                                                                                                                                                                                                                                                                                                                                                                                                                         |
| #6  | #3 OR #4                                                                                                                                                                                                                                                                                                                                                                                                                                                                                                                                                                                                                                         |
| #7  | #5 AND #6                                                                                                                                                                                                                                                                                                                                                                                                                                                                                                                                                                                                                                        |
| #8  | ((("Inappropriate Prescribing"[Mesh]) OR "Drug Prescriptions"[Mesh]) OR "Potentially Inappropriate Medication List"[Mesh])                                                                                                                                                                                                                                                                                                                                                                                                                                                                                                                       |
| #9  | ((((prescribing[Title/Abstract] OR prescription[Title/Abstract] OR prescriptions[Title/Abstract] OR medication[Title/Abstract] OR medications[Title/Abstract] OR medicine[Title/Abstract] OR medicines[Title/Abstract] OR drug prescription[Title/Abstract] OR drug prescriptions[Title/Abstract] OR inappropriate prescribing[Title/Abstract])) OR (prescribing[Text Word] OR prescription[Text Word] OR prescriptions[Text Word] OR medication[Text Word] OR medications[Text Word] OR medicine[Text Word] OR medicines[Text Word] OR drug prescription[Text Word] OR drug prescriptions[Text Word] OR inappropriate prescribing[Text Word]))) |
| #10 | #8 OR #9                                                                                                                                                                                                                                                                                                                                                                                                                                                                                                                                                                                                                                         |
| #11 | Guideline[Publication Type]                                                                                                                                                                                                                                                                                                                                                                                                                                                                                                                                                                                                                      |
| #12 | ((((guideline[Title/Abstract] OR tool[Title/Abstract] OR tools[Title/Abstract] OR guidelines[Title/Abstract] OR checklist[Title/Abstract] OR checklists[Title/Abstract] OR criteria[Title/Abstract] OR list[Title/Abstract] OR lists[Title/Abstract])) OR (guideline[Text Word] OR guidelines[Text Word] OR tool[Text Word] OR tools[Text Word] OR checklist[Text Word] OR checklists[Text Word] OR criteria[Text Word] OR list[Text Word] OR lists[Text Word])))                                                                                                                                                                                |
| #13 | #11 OR #12                                                                                                                                                                                                                                                                                                                                                                                                                                                                                                                                                                                                                                       |
| #14 | #10 AND #13                                                                                                                                                                                                                                                                                                                                                                                                                                                                                                                                                                                                                                      |
| #15 | #7 AND #14                                                                                                                                                                                                                                                                                                                                                                                                                                                                                                                                                                                                                                       |
| #16 | (#7 AND #14) Filters: Publication date from 1998/01/01 to 2018/12/31; English                                                                                                                                                                                                                                                                                                                                                                                                                                                                                                                                                                    |
